# Supplementary material for: Modelling the risk of Taenia solium exposure from pork produced in western Kenya
Source: PLoS Negl Trop Dis. 2017 Feb 17;11(2):e0005371. doi: 10.1371/journal.pntd.0005371 (PMC5333911; doi:10.1371/journal.pntd.0005371)
Supplement: S1 Model — (XLSX) [file pntd.0005371.s001.xlsx]

## Sheet: rsklibSimData
546a73bd1779ed166558b1566614325f0|1|6512180|e07a831392c9abe6df7cd185e8354985	672bcc7d18a2b144ff7a5c8fe03012f6_x0016__x0017_ÐÏ_x0011_à¡±_x001A_á_x0016__x0016__x0016__x0016__x0016__x0016__x0016__x0016__x0016__x0016__x0016__x0016__x0016__x0016__x0016__x0016_>_x0016__x0003__x0016_þÿ _x0016__x0006__x0016__x0016__x0016__x0016__x0016__x0016__x0016__x0016__x0016__x0016__x0016_d_x0016__x0016__x0016__x0001__x0016__x0016__x0016__x0016__x0016__x0016__x0016__x0016__x0010__x0016__x0016…	fb8639b1190c4f8c9b7f273cead2a1ab_x0001_ êJÍG1?ÐTìOë_x0005_?cô_x0006_åXÁ­?«Æ_x0007_®Þº?î»ò_x000D_Ó_x0014_¶?é_#j º?®bÚY_x0014_¡?rd»#X?B4¨õAo?¹@B¾_x0005_©?F_x0008_§_x0004_Þ_x0008_µ?_x0011_)e¢?nÎRà_x0018_@?É_x0018_£_x0011_èH¹?÷_x000E__x0002_´»?´?7Kí©Bµ?­æ_¡\$±?_x000E_0 $Tb?Ì]_x000E__x0013_À%?_x001A_í!Jµ©?ç_x0007__x000C_¡äû¥?_x0005_¬,_x0019_·?_x0006_yyK;_x0003_¶?¿1Xgéo©?_x001C_K=_…	87b62f6c8759894d32cf3a60415d8b84_x0002__x0004_³"C½¤?ë>ÂÏÝ¹?¯ÕÒä¯?ò^ak_x000D_¹?¬°Ï_x001A__x001E__x0011_­?; QRófµ?_x0001_ÝÛj¢?VYe&X²? 1_x001B_#Èâ?Ø? ãV~?}Ng_x0016_²?´âí¥?äX_x0006_Nu?½_x001C_f5¨«?;¢º_x000C_xÀ?¥¸K»?_x000C__x0002_Ð]äp¶?ü=é9_x001D_?_x0011__x000B_ã_x0006_l°?Áa@r¡?z_x000F_¦Î0¡?þö­JÅû¾?C_x000E_¯ÉºÜ?_x0004_¥|_x0011__x001E_ ?*ù¿%s ?a>f)Ê_°?(_x0007_pA¸å?ÈÈó…	7db00ddf9d7dbc0a250fbfea665f3c1b_x0001_ êJÍG1?ÐTìOë_x0005_?cô_x0006_åXÁ­?«Æ_x0007_®Þº?î»ò_x000D_Ó_x0014_¶?é_#j º?®bÚY_x0014_¡?rd»#X?B4¨õAo?¹@B¾_x0005_©?F_x0008_§_x0004_Þ_x0008_µ?_x0011_)e¢?nÎRà_x0018_@?É_x0018_£_x0011_èH¹?÷_x000E__x0002_´»?´?7Kí©Bµ?­æ_¡\$±?_x000E_0 $Tb?Ì]_x000E__x0013_À%?_x001A_í!Jµ©?ç_x0007__x000C_¡äû¥?_x0005_¬,_x0019_·?_x0006_yyK;_x0003_¶?¿1Xgéo©?_x001C_K=_…	555073a3ba0e206411455985e0cc15c3_x0006__x0010_ì8]X_x000D__x0002_¬?owéþV¥?_x0001__x0007_ó?äz_x000E_u'&°?âióÆÞt?»ð±öF²?Ýù!¾ó¢?_x0014_*£Þ{i±?×G%_x0005_#¤?_x0005_8_x0018_Y°?_x0007_º_x0003_5Û_x000F_¤?¨ã_x0018__x0006_î_x0014_º?ì©³Ãqó¶?#TÞ6¶?ãËX_x0010_¦?õ$_x000C_Ù÷>¸?_x0008_ý\£ñ_x0018_´?`qm_x0007_p£?¬¨¦1Ë·?_x0001_WÝñpý¸?0Æ_x000F_»©­?2_x0004_´ØäèÀ?^d_x0012_VÂ)?3_x001F_å>_x0001_(¬?{_x00…	93c65ac1ca5362126c905176a2fcdc2a_x0001__x0002_"¸_x000C_IÚ?"¸_x000C_IÚ?"¸_x000C_IÚ?"¸_x000C_IÚ?"¸_x000C_IÚ?"¸_x000C_IÚ?"¸_x000C_IÚ?"¸_x000C_IÚ?"¸_x000C_IÚ?"¸_x000C_IÚ?"¸_x000C_IÚ?"¸_x000C_IÚ?"¸_x000C_IÚ?"¸_x000C_IÚ?"¸_x000C_IÚ?"¸_x000C_IÚ?"¸_x000C_IÚ?"¸_x000C_IÚ?"¸_x000C_IÚ?"¸_x000C_IÚ?"¸_x000C_IÚ?"¸_x000C_IÚ?"¸_x000C_IÚ?"¸_x000C_IÚ?"¸_x000C_IÚ?"¸…	c5fb092ab69fb53167831ca8fc89b85e_x0001__x0002_ºB_x0003__x0018_¯Ø?î©?ªy_x000D_Ô?Æ_x0005_¦ÇÂ*Ó?Å]«_x000E_¤Ô?tèä+Ô?_x0001_¢ß.O¢×?½uÚ_x001B__x0014_4Ô?¹UÖÜÕ?2.UÓgþØ?97¥ZÔ?û½JìÙ?¯Aä¼æ×?Åàòé{Ö?B_x0004_ã\Ò_x001C_Ù?Ø}hæ~óÞ?å÷_x0008_kÚ?þ-i=µ¦Ø?¾ùÆå´ôÚ?4Ý_x001E_/A×? 0»fIÐ?(àcÎ ¨Û?ÃªÐKìØ?þkg_x001E_Ö?1nÕhÖ?ËÙ×w_x0005_xÛ?hk9íGÝ?:9I#ì'Ù?[ot_x0013_ÕÖ?jo÷BYÕ?/ÄZj¯Ó?²\>q©aØ?z(]÷_x0001__x00…	7116fe52d99c7d10c89bdb660dc3ea4d_x0001__x0002__²ÓXÐ?¡í1AiÓ?fSÿò+Û?wÂ7pOÕ?¥©¸ùî Ý?ß¹È+Ø?Ú²5Ï Ö?;9á<Û?xY_x0014_ÐôöÔ?a.&ÒÚ?& ù_x0002_Ø?öÂ_x0001_ ¿2Ø?26[_x001D_³¢Ó?£_x001B_r,o:Ó?ævÛ²*àÖ?æÓ¾Ê_x000E_Ú?-_x0012_»_x000E_T®Ð?f_x000E_~_x0017_:WØ?Ú=\ÅÖ? OéßÚÙ?sã _x001B_×?Ê¯íì×?)Á_x0012_OÃÝ?&Ý_x000E_×?U_x0001_#R_x001D_×?Æ±SØ¾&ß?Æ$äNÖ?QUjîf«Ú?@û_x0005_"v0Û?\_x0016_à_x0019_ß?Ì-;_…	69cb1864a436dd316853dc6fad5cafda_x0001__x0002_ºB_x0003__x0018_¯Ø?î©?ªy_x000D_Ô?Æ_x0005_¦ÇÂ*Ó?Å]«_x000E_¤Ô?tèä+Ô?_x0001_¢ß.O¢×?½uÚ_x001B__x0014_4Ô?¹UÖÜÕ?2.UÓgþØ?97¥ZÔ?û½JìÙ?¯Aä¼æ×?Åàòé{Ö?B_x0004_ã\Ò_x001C_Ù?Ø}hæ~óÞ?å÷_x0008_kÚ?þ-i=µ¦Ø?¾ùÆå´ôÚ?4Ý_x001E_/A×? 0»fIÐ?(àcÎ ¨Û?ÃªÐKìØ?þkg_x001E_Ö?1nÕhÖ?ËÙ×w_x0005_xÛ?hk9íGÝ?:9I#ì'Ù?[ot_x0013_ÕÖ?jo÷BYÕ?/ÄZj¯Ó?²\>q©aØ?z(]÷_x0001__x00…	2608ed839c76a8f5bcc62e1a66d6bf88_x0003__x0004__x0005__x0004_ÝC_x0006_LÜ?8¥Ú_x0003_oØÔ?4Üå×?Fñ¯ìéh×?åÄ9 ?ÔÙ?Çé,áªÚ?¥_x0012_°âÜ?¶_x0011_Ú¦7*Ù?F¿ó_x0006__x0002_×?^e.f_x001C_Ö?ºÕ\`Ý?T8_x000F__x0001_æØ?HÖÈKâÖ? PúÛ?Us\ÿ Õ?~Õ_x001D_÷G_x0003_Ú?¬xäñEÓÛ?Ññ~»ÂÔ?b%ä"4Ú?ðH'À_x0002_°Ò?QÔ_@(ØÙ?úB òÑD×?_x000B_ôB~@Ô?_x0011_nÖ_x0012_%»Ô?ôbRï)×?_x0004__x001C_yk Ð?_ð_x001F_3Õ?´2_x0017_v6Ú?ç_x…	256b4b9005b0bcc3020f3e4e6ae2a020_x0004__x0005__x0012_GdÒ*×?T_x0005_%S¶_x0015_Ý?ÞA_x0008__x000F_yÉÕ?L_x0016_3´;Ø?ª_x0001_ÕµÞ?ïÔí¢Þ?#öµ"HÕ?Ì|O2wÔ?Pzg_x0003_6Ù?çË,aa_x000E_Ô?=g{è£Û?^©íSñÚ?_x000E_»ì¿±_×?fRÌ÷¹Ò?fFgò}Ü?Åw{÷ Ñ?òªªËîíÞ?_x001D_=¿hðÖ? k_x001C_@_x0002_Ò?ÿåy·Ø?²¹1³×?Ã×7ãàÙ?k¢HYdØ?hç¸_x001E_VÓ?+"¤KÈpÝ?ä_x0012_>_x0016_cÔ?_x001E_ð÷Û?Z_x0019__x0018_½àØ?4a2Ø?&ÄÅwÂÙ…	2608ed839c76a8f5bcc62e1a66d6bf88_x0003__x0004__x0005__x0004_ÝC_x0006_LÜ?8¥Ú_x0003_oØÔ?4Üå×?Fñ¯ìéh×?åÄ9 ?ÔÙ?Çé,áªÚ?¥_x0012_°âÜ?¶_x0011_Ú¦7*Ù?F¿ó_x0006__x0002_×?^e.f_x001C_Ö?ºÕ\`Ý?T8_x000F__x0001_æØ?HÖÈKâÖ? PúÛ?Us\ÿ Õ?~Õ_x001D_÷G_x0003_Ú?¬xäñEÓÛ?Ññ~»ÂÔ?b%ä"4Ú?ðH'À_x0002_°Ò?QÔ_@(ØÙ?úB òÑD×?_x000B_ôB~@Ô?_x0011_nÖ_x0012_%»Ô?ôbRï)×?_x0004__x001C_yk Ð?_ð_x001F_3Õ?´2_x0017_v6Ú?ç_x…	a11925a422175c21ad4ce3b67cab3304_x0004__x0005__x0012_GdÒ*×?T_x0005_%S¶_x0015_Ý?ÞA_x0008__x000F_yÉÕ?L_x0016_3´;Ø?ª_x0001_ÕµÞ?ïÔí¢Þ?#öµ"HÕ?Ì|O2wÔ?Pzg_x0003_6Ù?çË,aa_x000E_Ô?=g{è£Û?^©íSñÚ?_x000E_»ì¿±_×?fRÌ÷¹Ò?fFgò}Ü?Åw{÷ Ñ?òªªËîíÞ?_x001D_=¿hðÖ? k_x001C_@_x0002_Ò?ÿåy·Ø?²¹1³×?Ã×7ãàÙ?k¢HYdØ?hç¸_x001E_VÓ?+"¤KÈpÝ?ä_x0012_>_x0016_cÔ?_x001E_ð÷Û?Z_x0019__x0018_½àØ?4a2Ø?&ÄÅwÂÙ…	a0a1b724995cfa9e2aa9d0eefd9127be_x0003__x0004__x0005__x0004_ÝC_x0006_LÜ?8¥Ú_x0003_oØÔ?4Üå×?Fñ¯ìéh×?åÄ9 ?ÔÙ?Çé,áªÚ?¥_x0012_°âÜ?¶_x0011_Ú¦7*Ù?F¿ó_x0006__x0002_×?^e.f_x001C_Ö?ºÕ\`Ý?T8_x000F__x0001_æØ?HÖÈKâÖ? PúÛ?Us\ÿ Õ?~Õ_x001D_÷G_x0003_Ú?¬xäñEÓÛ?Ññ~»ÂÔ?b%ä"4Ú?ðH'À_x0002_°Ò?QÔ_@(ØÙ?úB òÑD×?_x000B_ôB~@Ô?_x0011_nÖ_x0012_%»Ô?ôbRï)×?_x0004__x001C_yk Ð?_ð_x001F_3Õ?´2_x0017_v6Ú?ç_x…	23f581f873178e9b48d572761d3c6b6c_x0003__x0006_bmÏNJå?å_x0001_²ÑEá?ZÖ0X¢bà?æôÜ6CpÜ?¹,ÜzÛ?s5G»_x0010_ÍÜ?t03;TÓ?Å?r;Ú?ê_x000B_0[¹à?Êþ\Ü?x9okQB×?b3EäÂÛ?bë_x0006_§_x0010_Þ?|@ïÌagä?uEGr>á?RÂ¥¥m_x0002_à?èã>t)Ý?÷£êÒÑÒ?_x0005_Ò_x0004_åÓá?% f·íÔ?»eô»gÊà?Úã¾Æ:]Û?ºSð Ø?°­.OBÚ?_x0002__x000B_å_x0001_·öÞ?<d_x0002_÷: Þ?[_x000E_Øß¢à?÷Êî.6Ää?_x001C_$U».ð×?à¹Ì(ÅþÛ?|ò_x001A_¾ ªÝ?|±Aþ_x0002__x00…	641da016c6ae85587b3759ca958e500e_x0001__x0003_¼° r@ã?F¼_x0006_¤_x0005_²Þ?Õ'"@Aøã?_x0004_ ÉN_x0001_¾Ý?¢çËTià?â}:c_x001C__x0007_á?_x000C_ôf¦[hÝ?Y2ú_x001D__x000D_à?lk¥_x0006_]×?î(uzá?õ_x0002_ºq`GÌ?·½5ïá?ü¤BÈrGÝ?å«-¼Õ?_x000B_ÐÏßuá?_x001C_±´<±iÜ?Ð_x000B_þ_x0016_|Ö?¼ _x0006_Ð©â?n­æÛ?ír[Goá?D_x001B_V_x001B_½ª×?J¤)ÂYþß?P¤<Ö*_x0012_Ý?_x0013_Y8rÇæ?pÉx,ëÞÕ?±÷_x0019_ý_x001A_ÔÔ?lî>'ÿØ?ê2ý®…	3ca816aa898b9a2945a7fa6b78d84031_x0003__x0006_bmÏNJå?å_x0001_²ÑEá?ZÖ0X¢bà?æôÜ6CpÜ?¹,ÜzÛ?s5G»_x0010_ÍÜ?t03;TÓ?Å?r;Ú?ê_x000B_0[¹à?Êþ\Ü?x9okQB×?b3EäÂÛ?bë_x0006_§_x0010_Þ?|@ïÌagä?uEGr>á?RÂ¥¥m_x0002_à?èã>t)Ý?÷£êÒÑÒ?_x0005_Ò_x0004_åÓá?% f·íÔ?»eô»gÊà?Úã¾Æ:]Û?ºSð Ø?°­.OBÚ?_x0002__x000B_å_x0001_·öÞ?<d_x0002_÷: Þ?[_x000E_Øß¢à?÷Êî.6Ää?_x001C_$U».ð×?à¹Ì(ÅþÛ?|ò_x001A_¾ ªÝ?|±Aþ_x0002__x00…	d572f0f105c98889e3c9356acc4f8902_x0001__x0003_¼° r@ã?F¼_x0006_¤_x0005_²Þ?Õ'"@Aøã?_x0004_ ÉN_x0001_¾Ý?¢çËTià?â}:c_x001C__x0007_á?_x000C_ôf¦[hÝ?Y2ú_x001D__x000D_à?lk¥_x0006_]×?î(uzá?õ_x0002_ºq`GÌ?·½5ïá?ü¤BÈrGÝ?å«-¼Õ?_x000B_ÐÏßuá?_x001C_±´<±iÜ?Ð_x000B_þ_x0016_|Ö?¼ _x0006_Ð©â?n­æÛ?ír[Goá?D_x001B_V_x001B_½ª×?J¤)ÂYþß?P¤<Ö*_x0012_Ý?_x0013_Y8rÇæ?pÉx,ëÞÕ?±÷_x0019_ý_x001A_ÔÔ?lî>'ÿØ?ê2ý®…	1facee1fa23735eefe25fcdab207c121_x0002__x0003_¯¿sXÙdF@¾_ÍõQG@V 3_x0002_@î­_x001D_i­A@»VC2ár)@(<2Öý·C@ú)AK_x0016_"G@´>Kb©!_x001F_@ã ©o÷'@q¢ãù5@²0þ@F@@7Oñ¦_x0019_0@,-_x0001_%íC@ß«îZ_x0002__x0004_@¨Y´K|»B@1²Lð<@_@,÷çºF@°@UÞF­6@J2¨_x0002_»m@@cÜ_x0017_Þëb<@ô_x0003_³_x0017_hVG@²/=B[_x0011_@Ã©} B@¢Ñ?0a_?@Õ/ _x000D_Ê)3@¾5B@BÜ_x0016_U2@ ÞïºkA@_x0003__x001B_ýÓuA@Cd¼~!5@'iK¾R_x001…	6cb5c41bcec91c28a9d321b4f59364cd_x0002__x0003_Üe2xÑ4D@_x0005_#_x001B__x0004_@ºÁ;ã_x001F_oB@ª_x0003_÷$ô?¿_x0010__x0006_]+H@úDIKÒ_x0013_@»ÁÈÂË-ù?9·ö}ÉÌB@Ê_x001C_çùE@_x0013_"=_x0004_._x0018_@ÙÐ_x0015_r_x0001_D@_x0007_*]øp$@ùÐ_x000F_Ê´²:@ï±=ø_x0003_õ?@kç_x0005_B"1@ª^á¯_x0012_">@ä£_x0010__x001F_½7@ _x001E__x001A_½mF@¤2M_x0019_Ã4@ä^xÃ9~C@¶-l³u_x0019_@§_x0003__x0007_\_x001B_@Z­_x0008…	0a0f2f3553d89593214d65725d065854_x0002__x0003_¯¿sXÙdF@¾_ÍõQG@V 3_x0002_@î­_x001D_i­A@»VC2ár)@(<2Öý·C@ú)AK_x0016_"G@´>Kb©!_x001F_@ã ©o÷'@q¢ãù5@²0þ@F@@7Oñ¦_x0019_0@,-_x0001_%íC@ß«îZ_x0002__x0004_@¨Y´K|»B@1²Lð<@_@,÷çºF@°@UÞF­6@J2¨_x0002_»m@@cÜ_x0017_Þëb<@ô_x0003_³_x0017_hVG@²/=B[_x0011_@Ã©} B@¢Ñ?0a_?@Õ/ _x000D_Ê)3@¾5B@BÜ_x0016_U2@ ÞïºkA@_x0003__x001B_ýÓuA@Cd¼~!5@'iK¾R_x001…	0695eeb6f5f136d515b545590e5672ca_x0002__x0003_Üe2xÑ4D@_x0005_#_x001B__x0004_@ºÁ;ã_x001F_oB@ª_x0003_÷$ô?¿_x0010__x0006_]+H@úDIKÒ_x0013_@»ÁÈÂË-ù?9·ö}ÉÌB@Ê_x001C_çùE@_x0013_"=_x0004_._x0018_@ÙÐ_x0015_r_x0001_D@_x0007_*]øp$@ùÐ_x000F_Ê´²:@ï±=ø_x0003_õ?@kç_x0005_B"1@ª^á¯_x0012_">@ä£_x0010__x001F_½7@ _x001E__x001A_½mF@¤2M_x0019_Ã4@ä^xÃ9~C@¶-l³u_x0019_@§_x0003__x0007_\_x001B_@Z­_x0008…	5b70d365a606c2d1ad7c3368b640522a_x0002__x0005_bÄÐþ¼_x0010_½?99Ñòs¬¤?É_x001C_®(¤?_x0002_\ ¶_x0012_ÝÌ?&¾D_x0016_0_x000D_È?_x0003_¿.³9ÀË?kê]_x0007__x0006_2£?-F_x001D_Ç_x0001_µ?2ä+÷öGÄ?5ñ52(øÇ?8@Qt¿Ã?HôJ÷Ã_x001D_¸?Äu# åÌ?:V×°9¾?pS_x000D_°¶?*@ø@_x0003_¢?±Ýæ¯Å²?a¤üxµÇ?j:<A>?·À4°?Ï¿µ¥ÜÇ?_FD_x000B_mo²?Ö_x0004_e3_x0018_Â?P6MJ£?y¼¿!ã®?ð­ ©? ÒàEà¼?qµ9*;±?w»:èF©?iz¢LE­£?µ}É¿1ë³?´H5…	21c231d0df731267709bc8410f9daecc_x0001__x0008_Ë_x0015_@%_x0006__x000B_?o$ÜR_x0002_³?aY¹_x000C_?_x0015_FÛÓ._x0016_µ?ßeÄ+6·?öP¾ dT¢??Àô-ðÁ?Ûª%(Ó¥?,±µ'Â?¬hÍxl{»?Û_x000C_ Z_x0007_È©?¼_x0017_Ø_x000B_?_x0004_>¯N­?O }Ë_x001B_?_x0005_T²nµ?o_x001F_Îµsîµ?Êt`©º?`_x0002_Ob-?ß#r-½ÚÂ?v_x0003__x0004_Ccµ?Ö.GìæÇ?_x0007_=ûwá/§?{¥b*IÞÄ?_x0006_²Ü?L½?Ç¹<_x0018__x000D_¨?vCº_x001C_¼Ô?¡­iT(s½…	120807c4d626c997f9f9e1e3c21a7e54_x0002__x0005_bÄÐþ¼_x0010_½?99Ñòs¬¤?É_x001C_®(¤?_x0002_\ ¶_x0012_ÝÌ?&¾D_x0016_0_x000D_È?_x0003_¿.³9ÀË?kê]_x0007__x0006_2£?-F_x001D_Ç_x0001_µ?2ä+÷öGÄ?5ñ52(øÇ?8@Qt¿Ã?HôJ÷Ã_x001D_¸?Äu# åÌ?:V×°9¾?pS_x000D_°¶?*@ø@_x0003_¢?±Ýæ¯Å²?a¤üxµÇ?j:<A>?·À4°?Ï¿µ¥ÜÇ?_FD_x000B_mo²?Ö_x0004_e3_x0018_Â?P6MJ£?y¼¿!ã®?ð­ ©? ÒàEà¼?qµ9*;±?w»:èF©?iz¢LE­£?µ}É¿1ë³?´H5…	21c231d0df731267709bc8410f9daecc_x0001__x0008_Ë_x0015_@%_x0006__x000B_?o$ÜR_x0002_³?aY¹_x000C_?_x0015_FÛÓ._x0016_µ?ßeÄ+6·?öP¾ dT¢??Àô-ðÁ?Ûª%(Ó¥?,±µ'Â?¬hÍxl{»?Û_x000C_ Z_x0007_È©?¼_x0017_Ø_x000B_?_x0004_>¯N­?O }Ë_x001B_?_x0005_T²nµ?o_x001F_Îµsîµ?Êt`©º?`_x0002_Ob-?ß#r-½ÚÂ?v_x0003__x0004_Ccµ?Ö.GìæÇ?_x0007_=ûwá/§?{¥b*IÞÄ?_x0006_²Ü?L½?Ç¹<_x0018__x000D_¨?vCº_x001C_¼Ô?¡­iT(s½…	7200f5828f17e8f2e8d6d857450c628d_x0002__x0005_bÄÐþ¼_x0010_½?99Ñòs¬¤?É_x001C_®(¤?_x0002_\ ¶_x0012_ÝÌ?&¾D_x0016_0_x000D_È?_x0003_¿.³9ÀË?kê]_x0007__x0006_2£?-F_x001D_Ç_x0001_µ?2ä+÷öGÄ?5ñ52(øÇ?8@Qt¿Ã?HôJ÷Ã_x001D_¸?Äu# åÌ?:V×°9¾?pS_x000D_°¶?*@ø@_x0003_¢?±Ýæ¯Å²?a¤üxµÇ?j:<A>?·À4°?Ï¿µ¥ÜÇ?_FD_x000B_mo²?Ö_x0004_e3_x0018_Â?P6MJ£?y¼¿!ã®?ð­ ©? ÒàEà¼?qµ9*;±?w»:èF©?iz¢LE­£?µ}É¿1ë³?´H5…	162169cc1648a6a0376cfbfa64e8dfe6_x0001__x0003_¾_x0012_ÀcÞX@o÷§«Q@bU_x0004_2íS@_x0004_Q®_x0019_§AN@._x001E_U¬û¤X@e_x0007_Q7xÅL@ø/6ð©`S@_x0007_Ï_x0015_põÒX@¯o| ÿâQ@_x0002_4.çT@_x001C_hÄ#1jN@Þ0oY¦cX@;òü6àõU@êcð_x0006__x0014_¾I@RN²<rM@¯_x001E_Âþ×J@#_x001A_ý[ÀM@ì_x0019_ì_x0014_µ´Q@KbèT@;N@ÎÃÒ7#W@üzpI¿Q@|è¶=êT@ÎQ_x0014_ÜÖI@«_x001F_vÌR@¶_x001E_Ð_x000D_úS@òôïJT@½MCâüP@_x0006__x000F__x0…	1ab98517a3733cd33f0c1c35663adc76_x0002__x0006_é!b_x0002_*iT@_x0005_ö"-V@Â_x0005_­RW@r#Ñ;_x001F_T@+¦N@ÐhÅ_x000F_* W@VÛP^ÆÕX@_x0004_¶EîuQ@#à~E-MW@(èEñ°¥S@Hm/5«oX@"¸Æ¤¡T@×D1½Q@TsÅHfK@_x0002_³|-ºQ@_x0001_;_x0003_BÞI@'_x0015_µ´X@l,D÷W@x _x0004_¸âJ@_x0015_w¬T@à_x001B_{_x0006_ÈS@H`l8£Q@N_x000C_ÚßSzN@îOªû+X@ ÛàLF×W@z kòºÃQ@_x0014_aöø_x001B__x0012_P@_x000F__x0007_±_ô U@¯µ\¼¯dN@…	162169cc1648a6a0376cfbfa64e8dfe6_x0001__x0003_¾_x0012_ÀcÞX@o÷§«Q@bU_x0004_2íS@_x0004_Q®_x0019_§AN@._x001E_U¬û¤X@e_x0007_Q7xÅL@ø/6ð©`S@_x0007_Ï_x0015_põÒX@¯o| ÿâQ@_x0002_4.çT@_x001C_hÄ#1jN@Þ0oY¦cX@;òü6àõU@êcð_x0006__x0014_¾I@RN²<rM@¯_x001E_Âþ×J@#_x001A_ý[ÀM@ì_x0019_ì_x0014_µ´Q@KbèT@;N@ÎÃÒ7#W@üzpI¿Q@|è¶=êT@ÎQ_x0014_ÜÖI@«_x001F_vÌR@¶_x001E_Ð_x000D_úS@òôïJT@½MCâüP@_x0006__x000F__x0…	a478e8c82bcfa475215722a63839e43c_x0002__x0006_é!b_x0002_*iT@_x0005_ö"-V@Â_x0005_­RW@r#Ñ;_x001F_T@+¦N@ÐhÅ_x000F_* W@VÛP^ÆÕX@_x0004_¶EîuQ@#à~E-MW@(èEñ°¥S@Hm/5«oX@"¸Æ¤¡T@×D1½Q@TsÅHfK@_x0002_³|-ºQ@_x0001_;_x0003_BÞI@'_x0015_µ´X@l,D÷W@x _x0004_¸âJ@_x0015_w¬T@à_x001B_{_x0006_ÈS@H`l8£Q@N_x000C_ÚßSzN@îOªû+X@ ÛàLF×W@z kòºÃQ@_x0014_aöø_x001B__x0012_P@_x000F__x0007_±_ô U@¯µ\¼¯dN@…	f4920e239e53e6f4cb5a1096c9ff7451_x0002__x0006_ôG_x000B_|_x0001_:Þ?£ä_x001D_ÿóøÓ?ÖºÐ_x000B_Û?_x0012_u¹Ö?JÂØ®×Ù?äâ÷n_x000F_×?@×_x0005_w·_x0002_Ï?6_x0003_qõ_x001E_á?n` ÊM_x0008_Ó?óv^u³Ø?GD2«ë×?¸Ù¨/¿Ù?¨ÁézD_x0013_Ñ?+n_x0005_[QÞ?_x001A_X2Eù_x0014_Ú?8þr_x0008__x001D_Ó?_x0013__x0016__x0004_´:5Õ?Ã_x0008_4¯,Ö?|¡Å_x0014_nâÛ?ð(³.Åá?_x001C_HÑÑùÙÚ?_x0014_cÜ«+%×?ÒMà²_x0010_:Ø?/JNåFéÜ?!óAâ§ºß?_x0…	8fb51dcc0016a217db9de40ed3233cc5_x0003__x0004_4Åw_x000B__x0019_Ü?_x0007_©ÕN¾Õ?2 X§{Xß?M_x001C_=¾Ý?¹ß>{_x001D_Þ?<ÜðryÛ?^_x0015_°Á¬öØ?aí¥ô[_x0001_Þ?Ìý=§©Ò?â¸BxµÓ?¶Èær(×?½æ_x0005_lyÚ?¿º|¡D_x0002_à?ªÔÉRýÙ?¶0cÕ?n5¼ñå×?_x0018_­?n5ûá?4`Ð_x0019_-ÚÞ?°_x0010_ï3í«ß?T=rw­uß?ÇLÞúègÖ?X¬Ið'%Û?5Ë8¸åäÌ?B{g_x001C_2ßÕ?÷qlØ?¹¦Ü_x000F_j¶Û?lKUñ//Ò?ì6­L£×?_wÏ ÔÔ?¡;æ_x001B_[á?ò_x0019_äð-ß?ñ÷*_x000…	f4920e239e53e6f4cb5a1096c9ff7451_x0002__x0006_ôG_x000B_|_x0001_:Þ?£ä_x001D_ÿóøÓ?ÖºÐ_x000B_Û?_x0012_u¹Ö?JÂØ®×Ù?äâ÷n_x000F_×?@×_x0005_w·_x0002_Ï?6_x0003_qõ_x001E_á?n` ÊM_x0008_Ó?óv^u³Ø?GD2«ë×?¸Ù¨/¿Ù?¨ÁézD_x0013_Ñ?+n_x0005_[QÞ?_x001A_X2Eù_x0014_Ú?8þr_x0008__x001D_Ó?_x0013__x0016__x0004_´:5Õ?Ã_x0008_4¯,Ö?|¡Å_x0014_nâÛ?ð(³.Åá?_x001C_HÑÑùÙÚ?_x0014_cÜ«+%×?ÒMà²_x0010_:Ø?/JNåFéÜ?!óAâ§ºß?_x0…	75c3498d105e33da0ce3807a8979265a_x0003__x0004_4Åw_x000B__x0019_Ü?_x0007_©ÕN¾Õ?2 X§{Xß?M_x001C_=¾Ý?¹ß>{_x001D_Þ?<ÜðryÛ?^_x0015_°Á¬öØ?aí¥ô[_x0001_Þ?Ìý=§©Ò?â¸BxµÓ?¶Èær(×?½æ_x0005_lyÚ?¿º|¡D_x0002_à?ªÔÉRýÙ?¶0cÕ?n5¼ñå×?_x0018_­?n5ûá?4`Ð_x0019_-ÚÞ?°_x0010_ï3í«ß?T=rw­uß?ÇLÞúègÖ?X¬Ið'%Û?5Ë8¸åäÌ?B{g_x001C_2ßÕ?÷qlØ?¹¦Ü_x000F_j¶Û?lKUñ//Ò?ì6­L£×?_wÏ ÔÔ?¡;æ_x001B_[á?ò_x0019_äð-ß?ñ÷*_x000…	4fc610f870695bdb66c106f90e2e9d18_x0001__x0002_v@R.Ûã?v@R.Ûã?v@R.Ûã?v@R.Ûã?v@R.Ûã?v@R.Ûã?v@R.Ûã?v@R.Ûã?v@R.Ûã?v@R.Ûã?v@R.Ûã?v@R.Ûã?v@R.Ûã?v@R.Ûã?v@R.Ûã?v@R.Ûã?v@R.Ûã?v@R.Ûã?v@R.Ûã?v@R.Ûã?v@R.Ûã?v@R.Ûã?v@R.Ûã?v@R.Ûã?v@R.Ûã?v@R.Ûã?v@R.Ûã?v@R.Ûã?v@R.Ûã?v@R.Ûã?v@R.Ûã?v@R_x0001__x0002_.Ûã?v@R.Ûã?v@R.Ûã?v@R.Ûã?v@R.Ûã?v@R.Ûã?v@R.Ûã?v@R.Ûã?v@R.Ûã?v@R.Ûã?v@R.Ûã?v@…	c60eed709dca27afbd818aae14989b8e_x0001__x0002_S[_x0006_,"~@~É3C9Pf@^Qñ+í]}@Å¼_x0018_.Tn@Ì¦9!ø|@4ÈK/{@êã¿è_x0001_r@ÐÓÌ%ø&k@x_x001B_,³ù)h@dOâÖ}dZ@Ãg´|@cºF{@0iAÕòör@Üèxés@~á_x0016_O_x0014_uf@_x0015_Uû0i+ @<Þðø}@_x001C__x0019_ã÷éz@¾#IìÇk@ÇåÛ_x0001__x0012__@_x0010_ÆæAc@²]$ ½ã|@2Ö_x000D_0¨ßq@_x0010_®ß±ác[@B²ãwSu@¿*à¦þ+s@{JË¥ N}@¶Îÿ*µÀm@_x0004__x001B_)ñ_x000B_s@ò]_x0015_k¶9d@_x001…	add501fa10777b146936e867bf002a19_x0002__x0003_¿Ð9_x0001_¯o@ ¥ÿôJâj@=ê±_x0006_÷n@ó'd ùey@xë2y@®e_x0019_r@<&×PÃ_x000E_h@_x0004_v«"Zt@.<_x0010_³¦t@8_x000E_;u¤c@_x0018_DjÒ[@A,S¨³b@,³³¢ós@ÅrÚ<®m@¡_x0012__x0002__x0010_L~@iM7êG_x0019_a@ë}ß¬V©o@nMù_x000B_2Cx@_x001A_ Ð\Ø²p@¨ºhK]p@¤W<®R¸u@_x0013_Hx¢É}@_x0018_*Y_x0007_¡_x000D_{@uGàð£Z@äDf_x0007_Ã/`@_x0002_m_x001D__x0001_+·]@6åÇQüÃp@ë¹mê…	7fa9adb57aa1b6ee8101c9d09c00e2de_x0001__x0002_S[_x0006_,"~@~É3C9Pf@^Qñ+í]}@Å¼_x0018_.Tn@Ì¦9!ø|@4ÈK/{@êã¿è_x0001_r@ÐÓÌ%ø&k@x_x001B_,³ù)h@dOâÖ}dZ@Ãg´|@cºF{@0iAÕòör@Üèxés@~á_x0016_O_x0014_uf@_x0015_Uû0i+ @<Þðø}@_x001C__x0019_ã÷éz@¾#IìÇk@ÇåÛ_x0001__x0012__@_x0010_ÆæAc@²]$ ½ã|@2Ö_x000D_0¨ßq@_x0010_®ß±ác[@B²ãwSu@¿*à¦þ+s@{JË¥ N}@¶Îÿ*µÀm@_x0004__x001B_)ñ_x000B_s@ò]_x0015_k¶9d@_x001…	b227cf232f6597c47d1029e0982929f9_x0002__x0003_¿Ð9_x0001_¯o@ ¥ÿôJâj@=ê±_x0006_÷n@ó'd ùey@xë2y@®e_x0019_r@<&×PÃ_x000E_h@_x0004_v«"Zt@.<_x0010_³¦t@8_x000E_;u¤c@_x0018_DjÒ[@A,S¨³b@,³³¢ós@ÅrÚ<®m@¡_x0012__x0002__x0010_L~@iM7êG_x0019_a@ë}ß¬V©o@nMù_x000B_2Cx@_x001A_ Ð\Ø²p@¨ºhK]p@¤W<®R¸u@_x0013_Hx¢É}@_x0018_*Y_x0007_¡_x000D_{@uGàð£Z@äDf_x0007_Ã/`@_x0002_m_x001D__x0001_+·]@6åÇQüÃp@ë¹mê…	2b703b492d70c07908703ce34d9acfdf_x0001__x0003_£_x0004_ì¤«?cïÙUÖI¢?DG"òC½?Æ_x001E_;Í³A¬??_x0003_¯GæØ?({¢ßû ¸?/ÅÉaïí?_x0002__x000D_@*ÜQ¼?n¯¦_x001F_P$À?_x0004_ø ¹â¸?®m_x0007_×Á¶¤? Ç_x001A_Ù©?"Jtö¹êÁ?( 0_x0011_c7¦?5Ã_x0004_=ë7ª?Ü¿¢äqpÈ?¾³?_x000F_iÂ?6<¡_x0003_¢Â?>_x0003_dùìÂ?_x0019__x001C_8pÌÂ?Ã-eA ?ó_x0011_øw_x0008_Æ?]éÂ÷Ú_x0002_°?¯»³R_x0002_,?ÉðD*QÆ?ÿ]ÐþÁÔÆ?CaV]_x0004__x000B_È?IT,?…	fb948ae926539c6609c3c1a84e07ef6f_x0003__x0006_ùùPâÇ?]ªÁ<èã°?cÖ4ÄÎÂ«?_x0018_H©_x000F_<ËÇ?§Tq³_x0005_Pµ?ßö6_x0016_«§?_x0003__x0008_½ò{¥?øl,ü#¸?èÚ´_x0011_yt?AºH%Þ!Æ?ÈzR¤_x0002_%Ê?T_x0008__x000F_"¿½?vY-ª:È´?òÝ^Å0´?~×¦P@Ä?_x0011_u_x001C_´¹_x0014_±?I3Zß*¸?O Ý¬Ã?tø)SÅ?àåx Å?ô×cq »?­ã­_x0001_¶Á?^:¤_x000E_ÖW¶?+Û¼,ùCÂ?_x001A__x001D_?_x0004_×À?7÷Àù_x0008_»?ØtqVi¨·?Ù.Ö_À?ê _x0004_/Æ?ä…	b6c972b51201b20fdcaca609a0689a55_x0001__x0003_£_x0004_ì¤«?cïÙUÖI¢?DG"òC½?Æ_x001E_;Í³A¬??_x0003_¯GæØ?({¢ßû ¸?/ÅÉaïí?_x0002__x000D_@*ÜQ¼?n¯¦_x001F_P$À?_x0004_ø ¹â¸?®m_x0007_×Á¶¤? Ç_x001A_Ù©?"Jtö¹êÁ?( 0_x0011_c7¦?5Ã_x0004_=ë7ª?Ü¿¢äqpÈ?¾³?_x000F_iÂ?6<¡_x0003_¢Â?>_x0003_dùìÂ?_x0019__x001C_8pÌÂ?Ã-eA ?ó_x0011_øw_x0008_Æ?]éÂ÷Ú_x0002_°?¯»³R_x0002_,?ÉðD*QÆ?ÿ]ÐþÁÔÆ?CaV]_x0004__x000B_È?IT,?…	5a37b961bb168c2064d246da71ac6071_x0003__x0006_ùùPâÇ?]ªÁ<èã°?cÖ4ÄÎÂ«?_x0018_H©_x000F_<ËÇ?§Tq³_x0005_Pµ?ßö6_x0016_«§?_x0003__x0008_½ò{¥?øl,ü#¸?èÚ´_x0011_yt?AºH%Þ!Æ?ÈzR¤_x0002_%Ê?T_x0008__x000F_"¿½?vY-ª:È´?òÝ^Å0´?~×¦P@Ä?_x0011_u_x001C_´¹_x0014_±?I3Zß*¸?O Ý¬Ã?tø)SÅ?àåx Å?ô×cq »?­ã­_x0001_¶Á?^:¤_x000E_ÖW¶?+Û¼,ùCÂ?_x001A__x001D_?_x0004_×À?7÷Àù_x0008_»?ØtqVi¨·?Ù.Ö_À?ê _x0004_/Æ?ä…	64826dfc55e6d2306efa01bb4ec3169f_x0002__x0007_¶ÉÌ4Íò@>d2Ð@ØS_x0010_­®ì@[\_x0003_V)ç@r_x0008_6[_x0007__x001E_ð@B0_x000E_²ê"â@¼6qx½ë@"MºÌ´ò@YZ_x0003_6^è@_x0004_Hß_x0014__x0001_.Ø@7-îzó@Bñ(·¤Å@£y_x0014_ÆÓ@&ô¢_x001B_÷ñ©@Ê©%¥ó@ã_x0015_}_x000B__x0001_Á@4Ìïäªñã@+ûÄ_x000D_dËÞ@r_x0012_M¼Ø@(®ôK°Ý@íÍ6êKrò@_x0005_áöÈxÙ@F_x0001_9Z¯_x000F_ð@W@ÏHó@\8Dôíñ@z_x0019_ÁåÀôð@&IÖ_x0015_kó@ mÌ_…	ba2bc49600ea524d4a3ca62b94064ab8_x0001__x0004__x0012_ëã«°@´_x000D_ù6þ+á@kãÙbçï@¨ÞNc`§ä@¶4ðHðÈ@+_x001A_Ì. ç@_x0002_}_x0015_ÑEÇÔ@÷Èj*XÊÖ@PédSé>á@ÓÊÁ£ätÕ@¬Àc_x0003_ÿ@ð@¨ô·é]á@ëh\"(Ë@M÷¹Ü,Bâ@f[Ðajç@)Ïç.ò3Ø@5ÙþPy*Í@s_x001F_30ØYæ@èÉn_x000C_mÿð@²e_x0017_µ¤ï@¤¹ºøñ@À´¤¨BÑ@HÅ®}RÚ@ÓóS8_x0007_Ùé@£·7h4é@ÆÄQØtî@Í<¸¹+ò@;d6_x001C_Oè@]w£Éb_Ç@ÑìPÅáÞò@_x0012_I°ÀÈzØ@ã÷À_x0002__x0007_ÕÂì@¶ÉÌ4Íò@>…	90723b66e833ad058c2d97e029e91258_x0002__x0007_¶ÉÌ4Íò@>d2Ð@ØS_x0010_­®ì@[\_x0003_V)ç@r_x0008_6[_x0007__x001E_ð@B0_x000E_²ê"â@¼6qx½ë@"MºÌ´ò@YZ_x0003_6^è@_x0004_Hß_x0014__x0001_.Ø@7-îzó@Bñ(·¤Å@£y_x0014_ÆÓ@&ô¢_x001B_÷ñ©@Ê©%¥ó@ã_x0015_}_x000B__x0001_Á@4Ìïäªñã@+ûÄ_x000D_dËÞ@r_x0012_M¼Ø@(®ôK°Ý@íÍ6êKrò@_x0005_áöÈxÙ@F_x0001_9Z¯_x000F_ð@W@ÏHó@\8Dôíñ@z_x0019_ÁåÀôð@&IÖ_x0015_kó@ mÌ_…	ba2bc49600ea524d4a3ca62b94064ab8_x0001__x0004__x0012_ëã«°@´_x000D_ù6þ+á@kãÙbçï@¨ÞNc`§ä@¶4ðHðÈ@+_x001A_Ì. ç@_x0002_}_x0015_ÑEÇÔ@÷Èj*XÊÖ@PédSé>á@ÓÊÁ£ätÕ@¬Àc_x0003_ÿ@ð@¨ô·é]á@ëh\"(Ë@M÷¹Ü,Bâ@f[Ðajç@)Ïç.ò3Ø@5ÙþPy*Í@s_x001F_30ØYæ@èÉn_x000C_mÿð@²e_x0017_µ¤ï@¤¹ºøñ@À´¤¨BÑ@HÅ®}RÚ@ÓóS8_x0007_Ùé@£·7h4é@ÆÄQØtî@Í<¸¹+ò@;d6_x001C_Oè@]w£Éb_Ç@ÑìPÅáÞò@_x0012_I°ÀÈzØ@ã÷À_x0002__x0007_ÕÂì@¶ÉÌ4Íò@>…	d4198ed93399141c8dce4762376d5959_x0002__x0007_¶ÉÌ4Íò@>d2Ð@ØS_x0010_­®ì@[\_x0003_V)ç@r_x0008_6[_x0007__x001E_ð@B0_x000E_²ê"â@¼6qx½ë@"MºÌ´ò@YZ_x0003_6^è@_x0004_Hß_x0014__x0001_.Ø@7-îzó@Bñ(·¤Å@£y_x0014_ÆÓ@&ô¢_x001B_÷ñ©@Ê©%¥ó@ã_x0015_}_x000B__x0001_Á@4Ìïäªñã@+ûÄ_x000D_dËÞ@r_x0012_M¼Ø@(®ôK°Ý@íÍ6êKrò@_x0005_áöÈxÙ@F_x0001_9Z¯_x000F_ð@W@ÏHó@\8Dôíñ@z_x0019_ÁåÀôð@&IÖ_x0015_kó@ mÌ_…
[truncated: 153 more columns]

## Sheet: RiskSerializationData
1	0
0
0.00703436	TRUE	0	35	GF1_rK0qDwEAEAAsAQwjACYAYwCXAKsArAC6AMgABgEoASIBKgD//wAAAAAAAQQAAAAAL18oKiAjLCMjMC4wMF8pO18oKiAoIywjIzAuMDApO18oKiAiLSI/P18pO18oQF8pAAAAAS5SaXNrIHRoYXQgcG9yayBtZWFsIGlzIGluZmVjdGl2ZSBhZnRlciBjb29raW5nAQABARAAAgABClN0YXRpc3RpY3MDAQEA/wEBAQEBAAEBAQAEAAAAAQEBAQEAAQEBAAQAAAABzAACNgAuUmlzayB0aGF0IHBvcmsgbWVhbCBpcyBpbmZlY3RpdmUgYWZ0ZXIgY29va2luZwAALwEAAgACAA4BGAEBAQIBgBSuR+F6dD8AANejcD0K1+8/AAAFAAEBAQA…	1	1	2	GF1_Z0CmcQEAEADeAAwjACYAMgCOAJwAnQC8AMoAAAAAANYAKAD//wABEAEEAAAAAAAAAAABLlJpc2sgdGhhdCBwb3JrIG1lYWwgaXMgaW5mZWN0aXZlIGFmdGVyIGNvb2tpbmcBKENvcnJlbGF0aW9uIENvZWZmaWNpZW50cyAoU3BlYXJtYW4gUmFuaykBAQoAAgABBE5vbmUDAAEA/wEBAQEBEUNvZWZmaWNpZW50IFZhbHVlAQEBAAQAAAABAQEBAQABAQEABAAAAAHOAAMIAAAAAC8BAAUAAQEBAAAB_x0001_0~0~>75%~<25%~>90%~_x0002__x0003_10~0~0.95~1~False~False~True~0.1~	>75%	<25%	>90%																					0.00703436	20	1	FALSE	TRUE	0	FALSE	#NAME?		0	0	0		>75%	<25%	>90%
0
FALSE	14560	6215	5670	3720
FALSE	14560	6215	5930	0
FALSE	14560	6215	5930	0
FALSE	14560	6215	5930	0
FALSE	14560	6215	5930	0
0
0	FALSE	FALSE	10	0.95	1

## Sheet: RiskSwappedFuncs
1	60	46	92	0	0	0
0.00197292	#NAME?	0.022936	#NAME?	0.000262921	#NAME?	0.137616	#NAME?	0.00157752	#NAME?	0.022936	#NAME?	0.000262921	#NAME?	0.592549	#NAME?	0.00477862	#NAME?	0.00782184	#NAME?	0.00104237	#NAME?	0.00625424	#NAME?	1	#NAME?	1	#NAME?	0.00104237	#NAME?	0.0268392	#NAME?	1	#NAME?	0.0990755	#NAME?	0.00703436	#NAME?	26988.7	#NAME?	1008.75	#NAME?	0.172109	#NAME?	0.043	#NAME?	0.375833	#NAME?	0.375833	#NAME?
[truncated: 42 more columns]

## Sheet: MODEL
Intervention
0 = No intervention 1= Meat Inspection 2 = Penside Test	0		Enter 1 here for Meat Inspection, 2 for Penside Test
Health Education 0= No, 1 = Yes	0		Enter 1 here for Health Education, 0 for none
meals eaten/ year Busia	3836700			Probabilities of different senarios as defined above						Pr(S)*Pr(inf¦S)
							Probabilities of Infection under different senarios
risk that meal came from pig which was				PS1	0.172109		P(infective¦ S1)	0.1122		0.0193106
informally slaughtered	0.043			PS2	0.00197292		P(infective¦ S2)	0		0
formally slaughtered	0.957			PS3	0.022936		P(infective¦ S3)	0.34		0.00779822
				PS4	0.000262921		P(infective¦ S4)	0		0
Risk that pig was infected				PS5	0.137616		P(infective¦ S5)	1		0.137616
formal	0.375833			PS6	0.00157752		P(infective¦ S6)	0		0
informal	0.375833			PS7	0.022936		P(infective¦ S7)	1		0.022936
				PS8	0.000262921		P(infective¦ S8)	0		0
level of infection		scaled (P/SumP)		PS9	0.592549		P(infective¦ S9)	0		0
light	0.484	0.484		PS10	0.00477862		P(infective¦ S10)	0		0
medium	0.0645	0.0645		PS11	0.00782184		P(infective¦ S11)	0.1122		0.000877611
heavy	0.387	0.387		PS12	0.00104237		P(infective¦ S12)	0.34		0.000354407
v.heavy	0.0645	0.0645		PS13	0.00625424		P(infective¦ S13)	1		0.00625424
	1	1		PS14	0.00104237		P(infective¦ S14)	1		0.00104237
risk that pig				PS15	0.0268392		P(infective¦ S15)	0		0
infected/detected	0.0113333			sum	1					0.196189
infected/escapes	0.988667
uninfected/detected	0.008
uninfected/escapes	0.992
Risk that pork meal contains a cyst if from;
lightly infected pig	0.1122
medium infected pig	0.34
heavily infected pig	1
v. heavily infected pig	1
uninfected pig	0
pig detected at meat inspection	0
probability cyst is viable	0.505
Risk that meal is undercooked	0.071
Risk that pork meal is infective before cooking	0.0990755
Risk that pork meal is infective after cooking	0.00703436
number of potentially infective pork meals eaten per year	26988.7
no. potentially infective pork meals detected by meat inspection	1008.75

## Sheet: input sheet
Imputs
Item	Value		Source	Comment
population of study site	230253		DLPO Human & Livestock census data 2009
% of population taking pork daily	0.7
% of population taking pork weekly	16.3		PAZ homestead Data
% of population taking pork monthly	38.2		PAZ homestead Data
% of population taking pork yearly	16.4		PAZ homestead Data
% of population taking pork on speical occasions	4.6		PAZ homestead Data
total % taking pork	76.2
number of people taking pork daily	161177		population * proportion of population taking pork daily
number of people taking pork weekly	3.75312e+06		population * proportion of population taking pork weekly
number of people taking pork monthly	8.79566e+06		population * proportion of population taking pork monthly
number of people taking pork yearly	3.77615e+06		population * proportion of population taking pork yearly
number of people taking pork on special occassions	1.05916e+06		population * proportion of population taking pork on special occassions
total	1.75453e+07
number of pork meals taken daily	5.88296e+07		number of people taking pork daily *365
number of pork meals taken weekly	1.95162e+08		number of people taking pork weekly *52
number of pork meals taken monthly	1.05548e+08		number of people taking pork monthly *12
number of pork meals taken yearly	3.77615e+06		number of people taking pork yearly *1
number of pork meals taken on special occassions	529582		number of people taking pork on special occassions *.5
Total number of pork meals taken/year	3.63846e+08
Chance of pork meal coming from informally slaughtered pig	0.043		thomas 2014 (thesis)
Chance of pork meal coming from formally slaughtered pig	0.957
Risk of pork meal coming from infected pig (formal slaughter)	0.375833		Slaughter Slab Study_LFD/EMF 2010
Risk of pork meal coming from infected pig (inormal slaughter)	0.375833		Praet et al, 2010
probability of pig being lightly infected	0.484		literature (fine dissection)
probability of pig being moderately infected	0.0645
probability of pig being heavily infected	0.387
probability of pig being v heavily infected	0.0645
risk meal contains cysticerci (light)	0.1122
risk meal contains cysticerci (mod)	0.34
risk meal contains cysticerci (heavy)	1
risk meal contains cysticerci (v heavy)	1
infected/detected	0.0113333		thomas et al 2015
infected/escapes	0.988667
uninfected/detected	0.008
uninfected/escapes	0.992
probability of any one cysticercus being viable	0.505		Flisser 2004
Risk meal eaten undercooked	0.071		PAZ homestead Data = proportion of respondents who state preference for pork cooked other than brown all through
number pork meals eaten per year	3836700

## Sheet: Formal vs Informal Slaughter
			probability pig is slaughtered informally	3	0.043
			Probability pig is slaughtered formally	66	0.957
					1

## Sheet: Prevalence of Cysticercosis
		From where?	details of study
Risk of pig being infected at formal slaughter	0.375833	Slaughter Slab Study_LFT/EMF 2015	343 pigs sampled from all registered slabs in 10 divisions of Western Kenya selected purely for presence of pigs, no selection for risk factors. No significant differences between divisions
Risk of pig being infected at informal slaughter	0.375833	Slaughter Slab Study_LFT/EMF 2015	DRC, village sites specifically selected for presence of CC risk factors. 153 pigs sampled, no significant differences between villages
			NB Significant difference between our pigs and DRC village pigs
			Praet et al 2010 found no sig differences between prevalence in formaly and informally slaughtered pigs. So same prev used in both.
			villages selected for presence of risk factors, 153 pigs sampled, 41% prevalence

## Sheet: Level of Infection
severity	severity	probability	cysts/pig
probabily pig is lightly infected	pig is lightly infected	0.484	25.5
probabily pig is moderately infected	pig is moderately infected	0.0645	75.5
probabily pig is heavily infected	pig is heavily infected	0.387	300.5
probabily pig is v.heavily infected	probabily pig is v.heavily infected	0.0645	40420.5
		1
meal/pig	225
probability meal infected
	mean	min	max
mean number of cysts/ meal (light)	0.113333	0.00444444	0.222222	0.1122
mean number of cysts/ meal (Mod)	0.335556	0.226667	0.444444	0.34
mean number of cysts/ meal (Heavy)	1.33556	0.448889	2.22222	1
mean number of cysts/ meal (v.Heavy)	179.647	2.22667	356.907	1
Probability any one cysticercus is viable		0.001	1	0.505

## Sheet: Intervention Parameters
current meat inspection	probability
pig infected/detected at meat inspection	0.0113333
pig infected/escapes detection at meat inspection	0.988667
pig uninfected/detected at meat inspection	0.008
pig uninfected/escapes detection at meat inspection	0.992

## Sheet: Pork Eating Behaviour
Sample Size	no. eating meat							pork cooked
2116	Daily	Weekly	Monthly	Yearly	sp. Occasions	Total eating pork		Brown through	Brown on outside	Dry	Red	slightly pink	White	NR	other
	15	345	808	347	97	1612	1612	259	13	4	3	2	3	4	2
	0.7	16.3	38.2	16.4	4.6	76.1815	76.2	0.16067	0.00806452	0.00248139	0.00186104	0.00124069	0.00186104	0.00248139	0.00124069
number of people	161177	3.75312e+06	8.79566e+06	3.77615e+06	1.05916e+06	1.75453e+07
meals	365	52	12	1	0.5				well cooked = brown throughout
99%CI	0.4-1.4	14.3-18.5	35.5-40.9	14.4-18.6	3.5-5.9
						0
probability infective event in one year	2.56754	0.365787	0.0844123	0.00703436	0.00351718			therefore risk undercooked = 1 - proportion brown throughout
potential new cases	161177	1.37284e+06	742463	26562.8	3725.27	2.30677e+06
						1001.84		Risk of pork meal being undercooked
								0.071
	number
pigs busia district	21315									number of meals per pig
20% crude mortality	17052									mean weight pig (g)	22500
meals/pig	225									mean weight meal (g)	100
pork meals consumed/year Busia district	3836700									meals/pig	225

[truncated: 2 more sheets: human population data, senseInfo]
